# Supplementary material for: Tropical seagrass under range extension provides similar ecosystem services compared to natural meadows
Source: Research Square preprint supplement (doi:10.21203/rs.3.rs-7000678/v1), 2025-09-23
Supplement: Supplementary file 1 [file 9108c8efe89f876ad559c17b.docx]

**Tropical seagrass under range extension provides similar range of ecosystem services compared to established meadows: A case study from the east coast of India**

Amrit Kumar Mishra, Biswajit Mahari, Anjalis Mishra, Sandip Kumar Mohakud, Syed Hilal Farooq, Prasant Mohanty

**Supplementary**

Figure I. The seagrass a) *H. ovalis*, b) *H. uninervis* and c) *R. maritima* meadows from our study sites of the coast of Odisha, India.

| **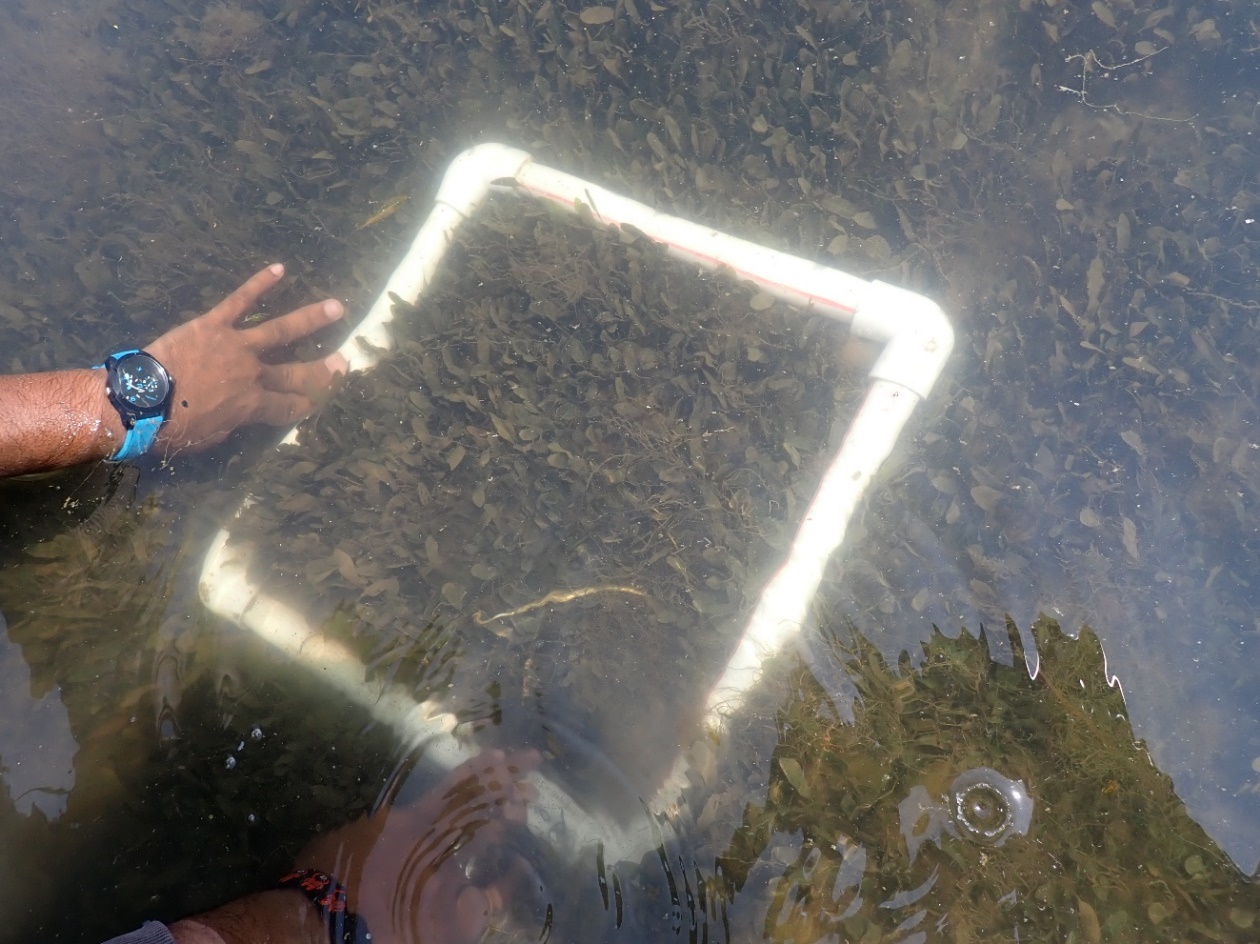**   1. *H. ovalis* meadows |
| --- |
| **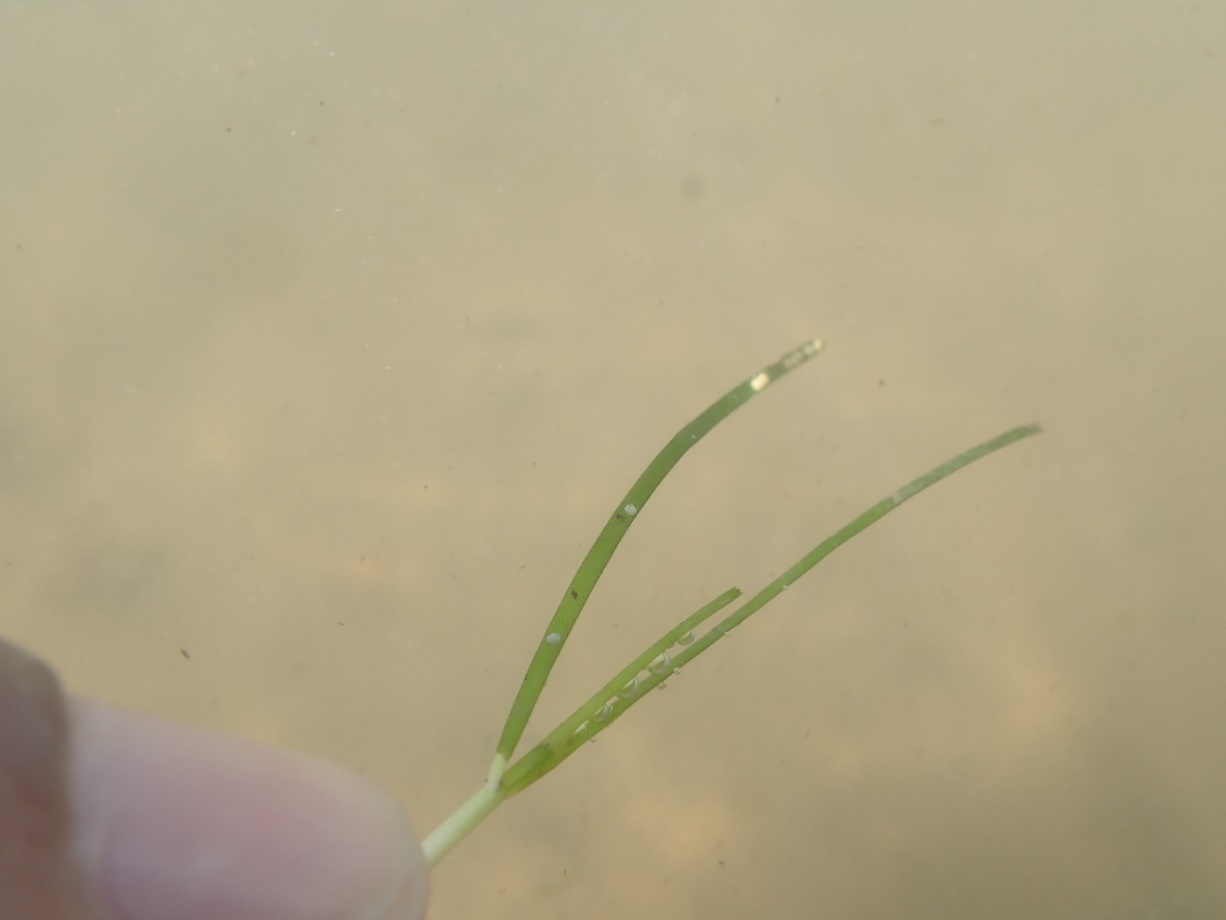**   1. *H. uninervis* |
| **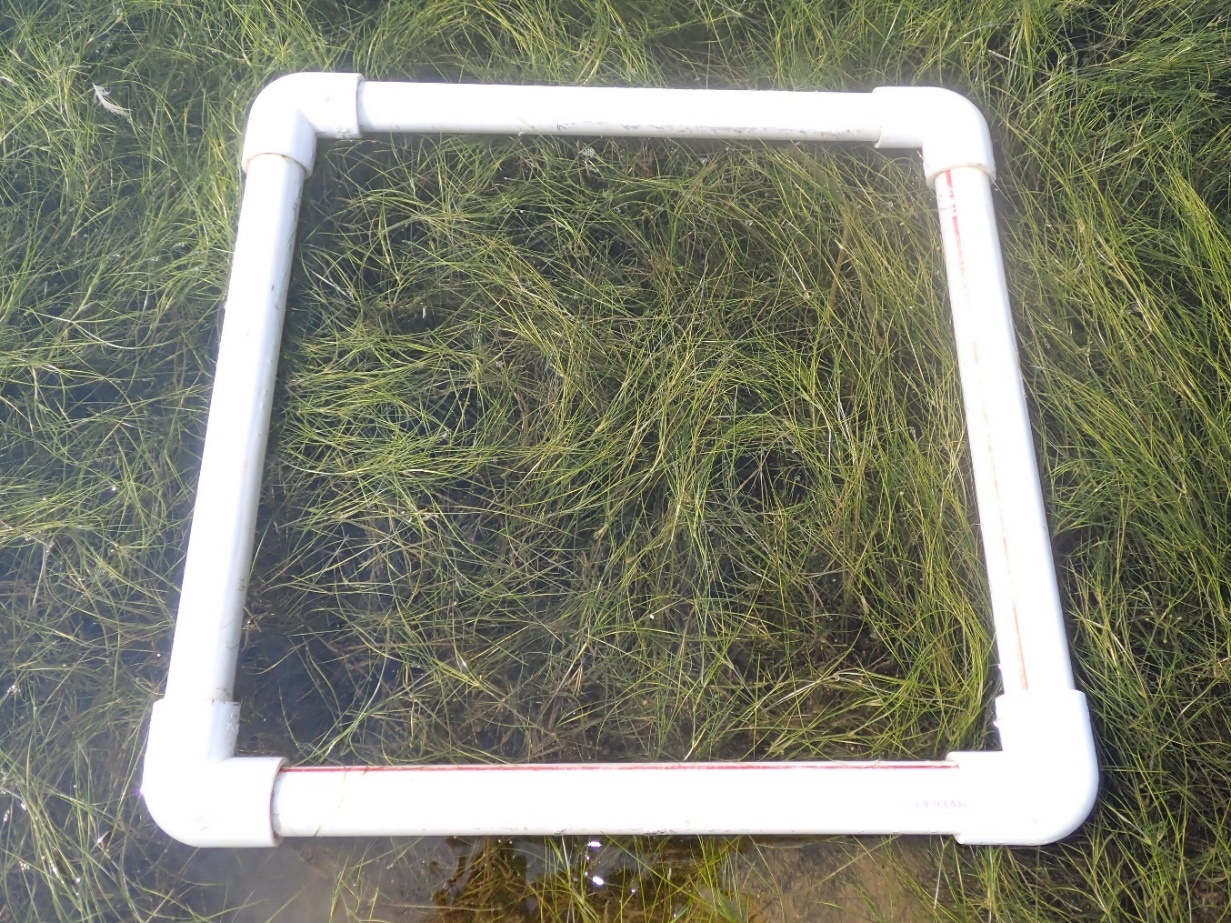**   1. *R. maritima*meadows |

Figure II. Mean ± SD of surface water salinity (psu) and sediment total carbon (C%), nitrogen (N%) and sulfur (S%) in the newly discovered meadows of our study sites compared with meadows of the same seagrass species from the Chilika lagoon from the coast of Odisha, India. Statistical significance (p<0.05) was derived from one-way ANOVA analysis using species as fixed factors. (p<0.001***, not significant ns).

| 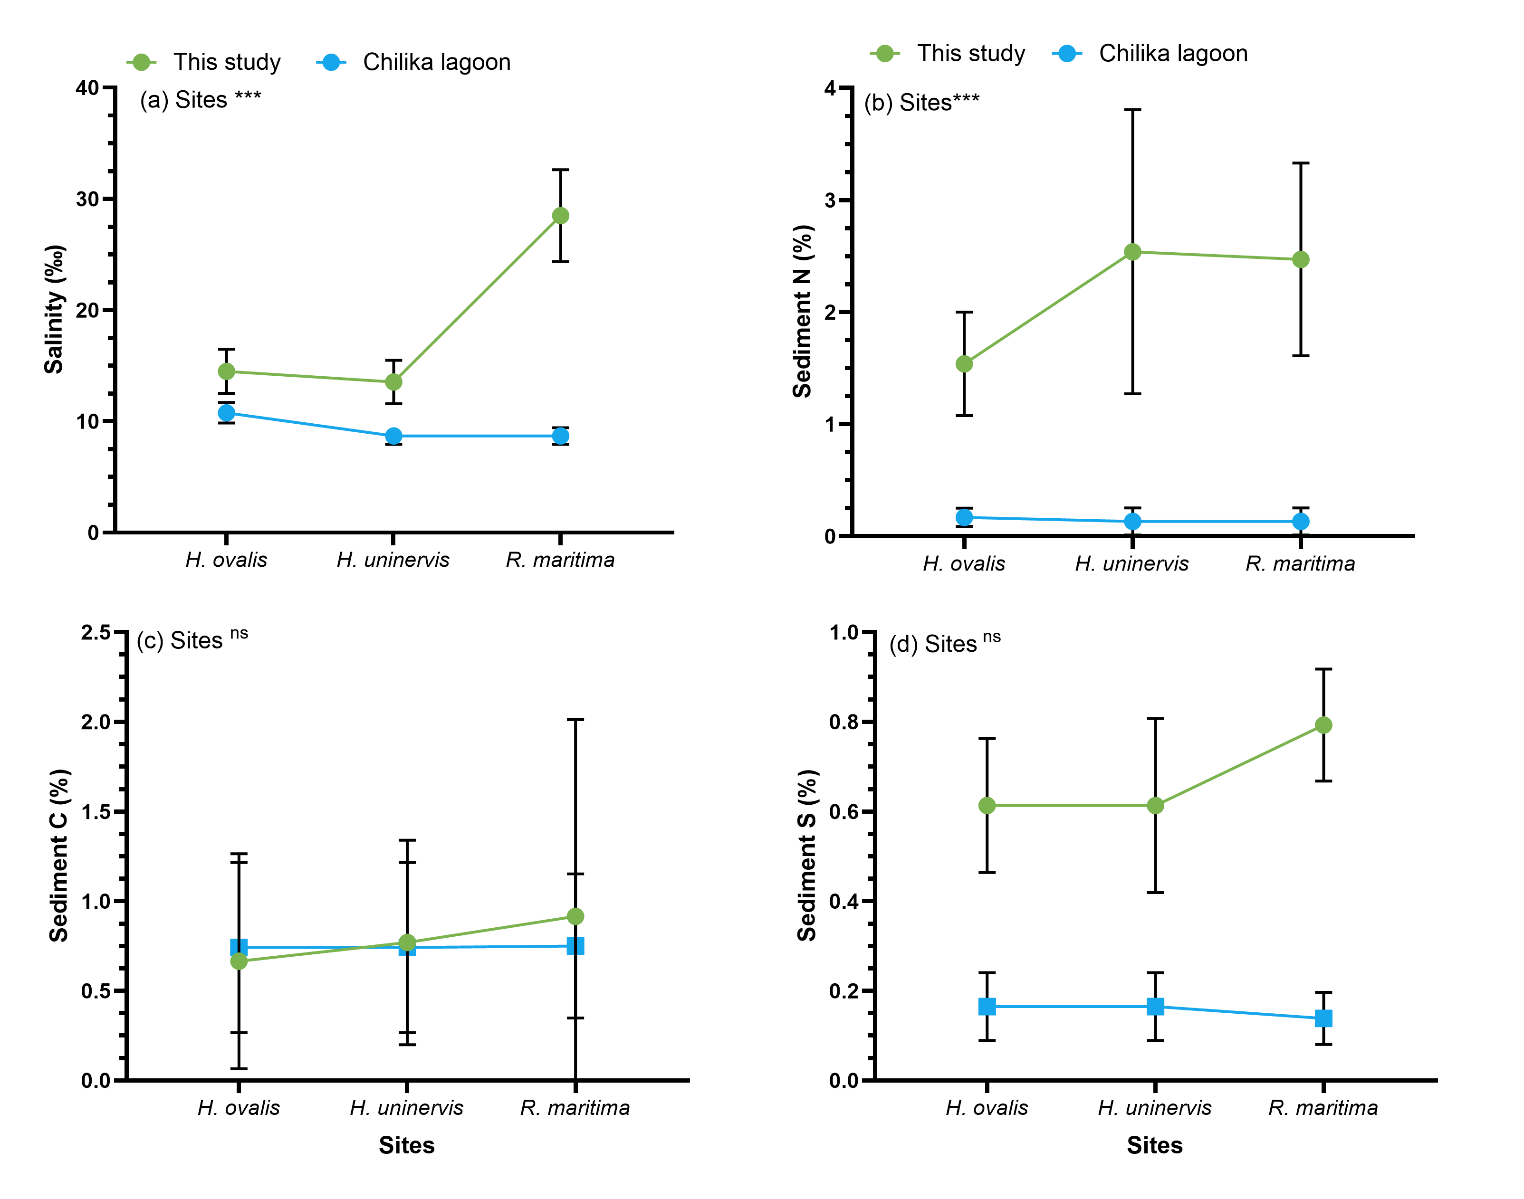 |
| --- |

Table III. Mean ± SD of seagrass species-specific sediment C, and CO2 stocks and their economic value in US$ from our study sites of the coast of Odisha, and compared with other studies from India where sediment C stocks (top 10-30 cm) of *H. ovalis* or *H. uninervis* or *R. maritima* was included.

|  | **This study** | | | **Other studies from India** | |
| --- | --- | --- | --- | --- | --- |
| **Seagrass Species** | **C stocks**  **(Mg C ha-1)** | **CO2 stocks**  **(Mg CO2 ha-1)** | **Price in US$ millions** | **C stocks (Mg C ha-1)** | **Reference** |
| *H. ovalis* | 1.73 ± 0.97 | 6.37 ± 3.56 | 0.00054± 0.0003 | 0.99 to 11.9 | Kaladharan et al., 2020, 2021, Murugan et al., 2024 |
| *H. uninervis* | 1.48 ± 0.26 | 5.43 ± 0.98 | 0.00046 ± 0.0008 |
| *R. maritima* | 6.93 ± 2.28 | 25.44 ± 8.39 | 0.0021 ± 0.0007 | NA | NA |

Table IV. Principal component contributions for the PCA results presented in Figure 3.

|  | **PC summary** | **PC1** | **PC2** | **PC3** | **PC4** | **PC5** |
| --- | --- | --- | --- | --- | --- | --- |
| C stocks | Eigenvalue | 8.454 | 4.598 | 4.106 | 2.164 | 1.676 |
|  | Proportion of variance | 40.26% | 21.90% | 19.55% | 10.31% | 7.98% |
|  | Cumulative proportion of variance | 40.26% | 62.16% | 81.71% | 92.02% | 100.00% |
| N stocks | Eigenvalue | 7.952 | 4.862 | 4.257 | 2.331 | 1.598 |
|  | Proportion of variance | 37.87% | 23.15% | 20.27% | 11.10% | 7.61% |
|  | Cumulative proportion of variance | 37.87% | 61.02% | 81.29% | 92.39% | 100.00% |

Figure V. Nonlinear relationship with 95% confidence interval, between biomass nitrogen (N) and C:N ratios of the three seagrass species; *H. ovalis*, *H. uninervis* and *R. maritima* from the coast of Odisha, India showcasing high external N input at our study sites. Dashed lines indicate the threshold values for N and C:N ratios in global seagrasses related to the balance between external N supply and internal utilization by the plants (Duarte, 1990).

| 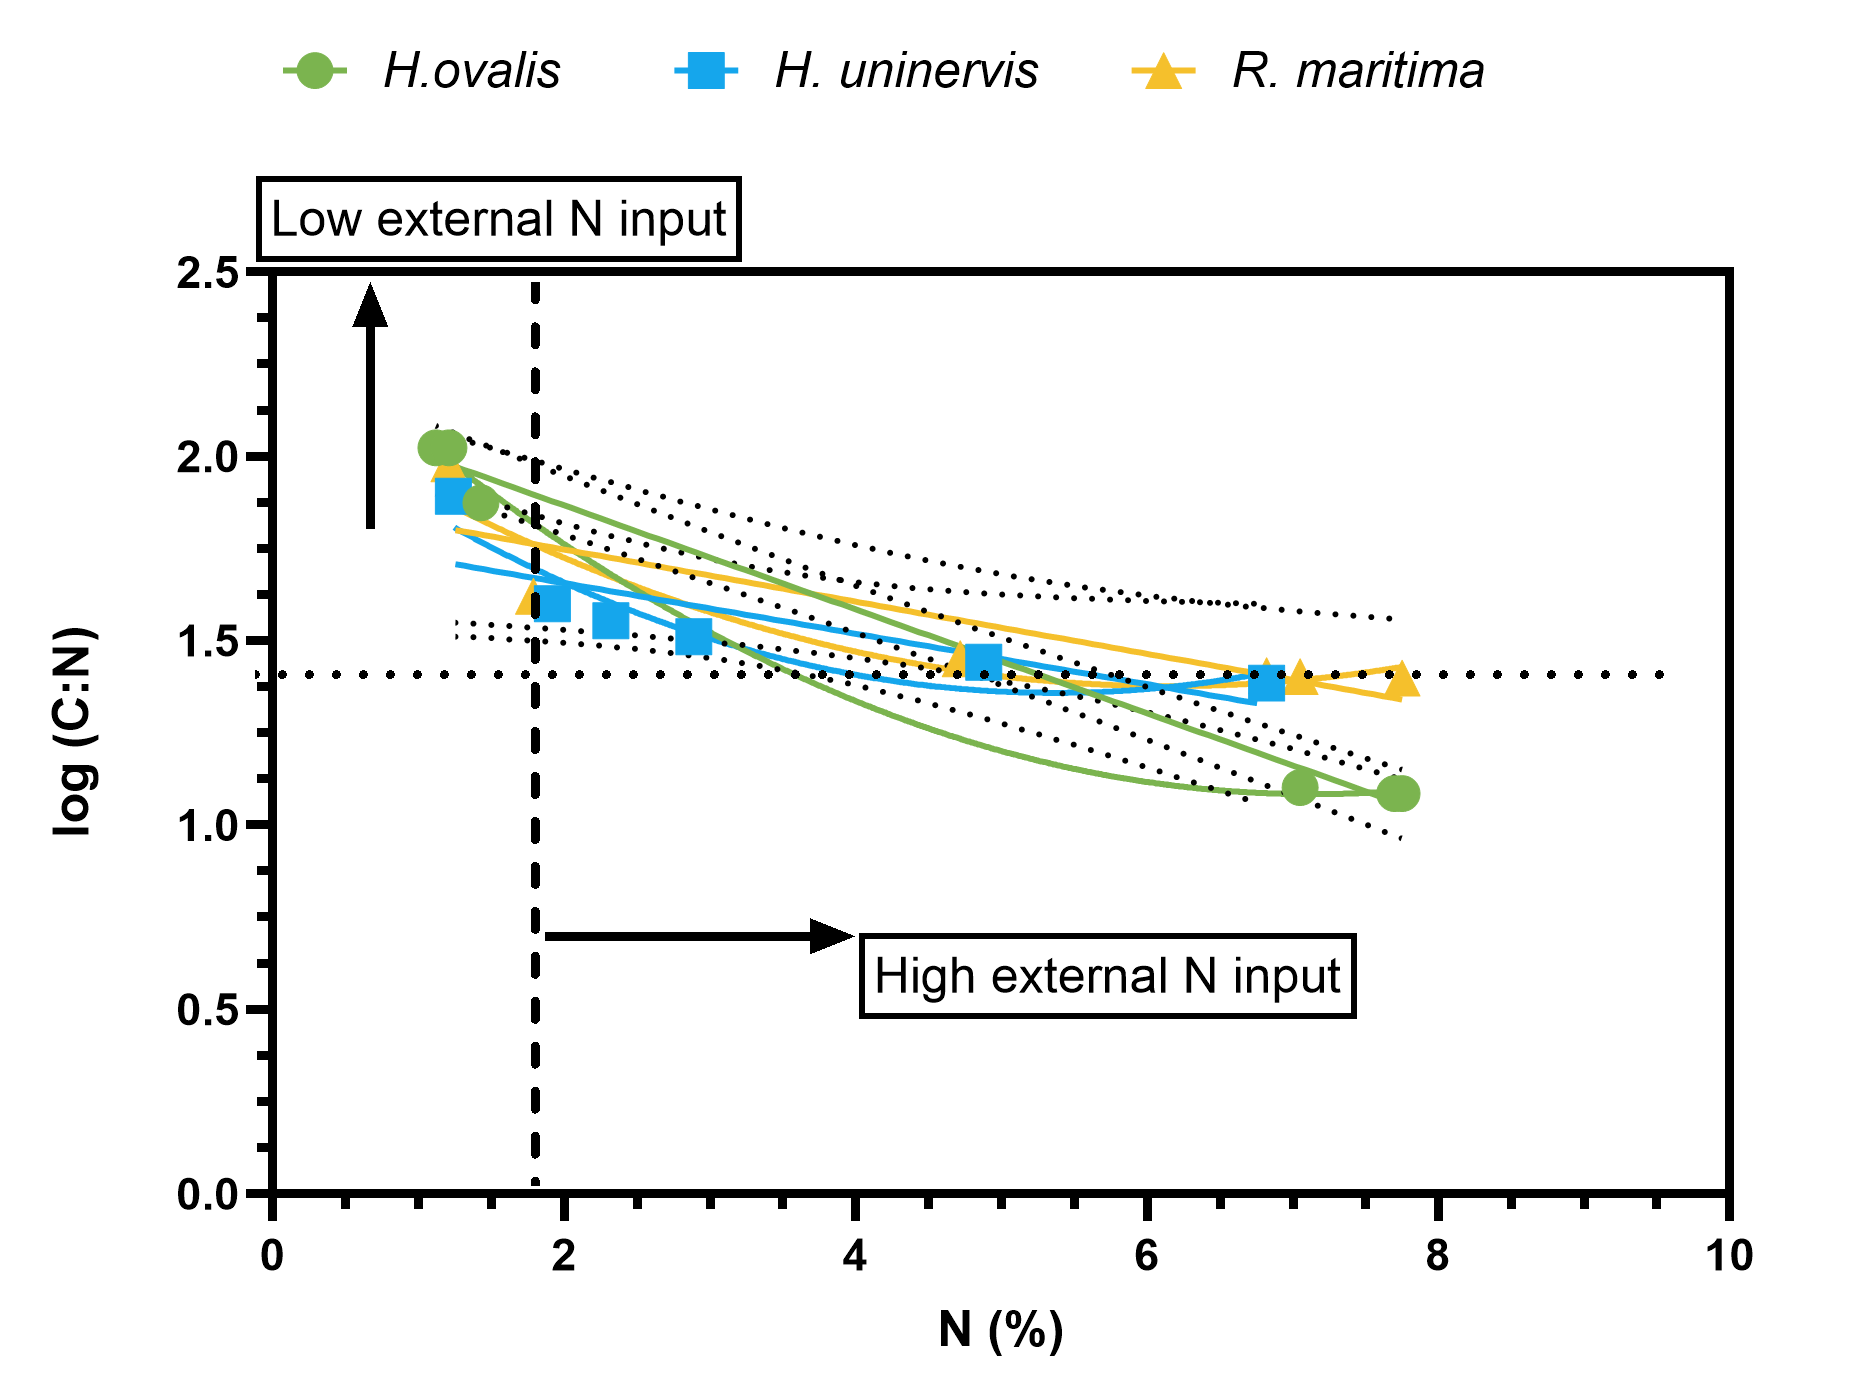 |
| --- |

Figure VI. Mean ± SD of seagrass morphometrics, i.e., leaf length (cm), leaf width (cm), horizontal internode (cm) and petiole length (cm) of the three seagrass species from the newly discovered seagrass meadows of our study sites compared with meadows of the same seagrass species from the Chilika lagoon from the coast of Odisha, India. Statistical significance (p<0.05) was derived from one-way ANOVA analysis using species as fixed factors. (p<0.0001****, not significant ns). An unpaired t-test was used for the leaf width analysis due to *R. maritima* having cylindrical leaves.

| 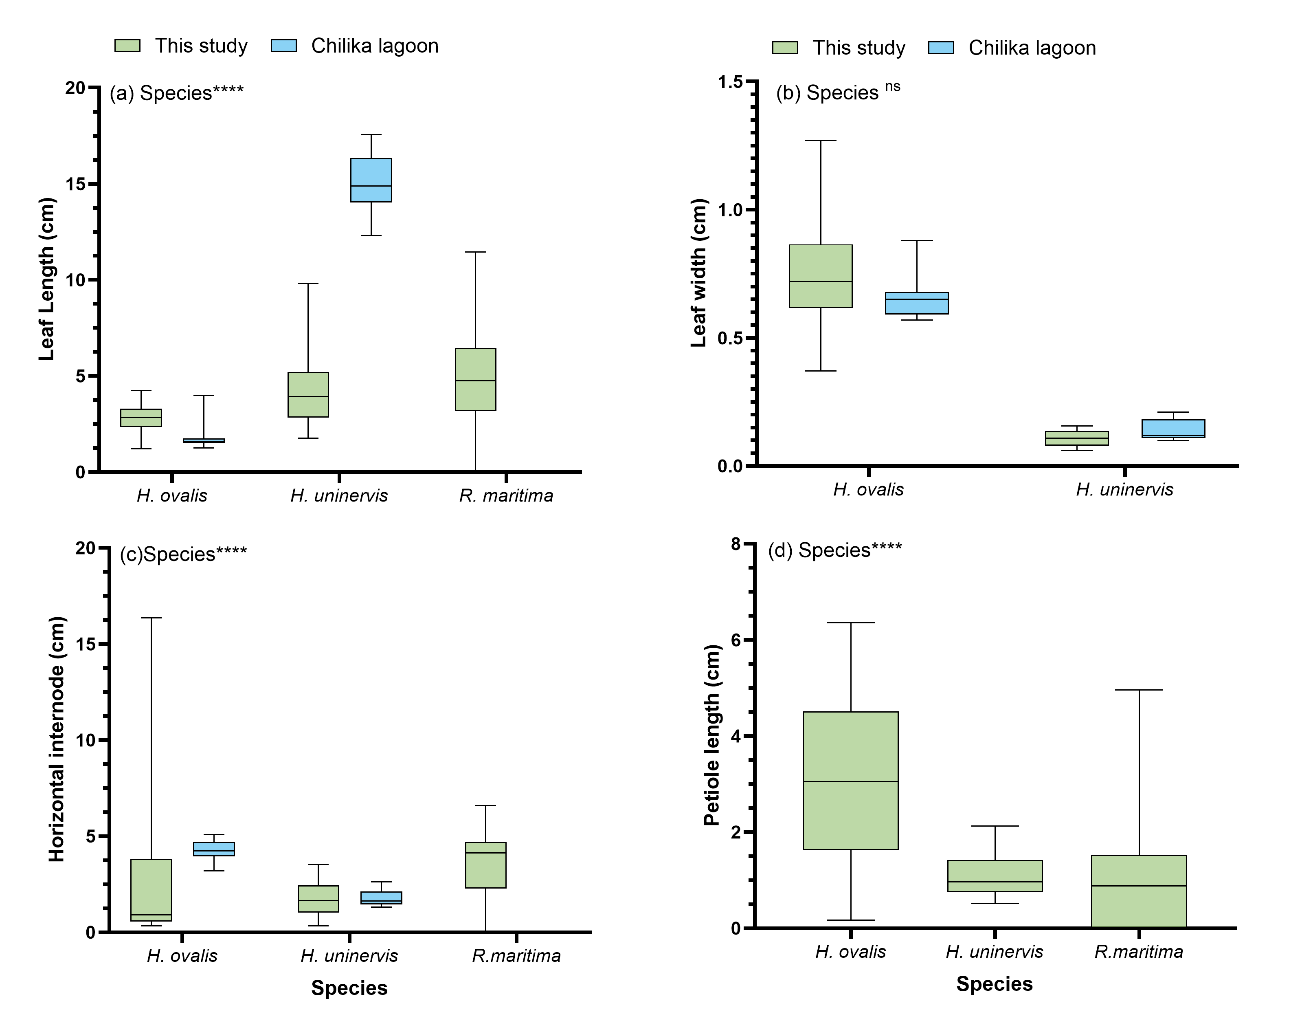 |
| --- |

Figure VII. Range of seagrass a) shoot density, b) total biomass and c) C and N stocks of all three species from the coast of Odisha, India. Statistical significance (p<0.05) was derived from one-way ANOVA analysis using species as fixed factors, (p<0.0001****, p<0.001***). The data from Chilika lagoon is presented for comparison and derived from literature review.

| 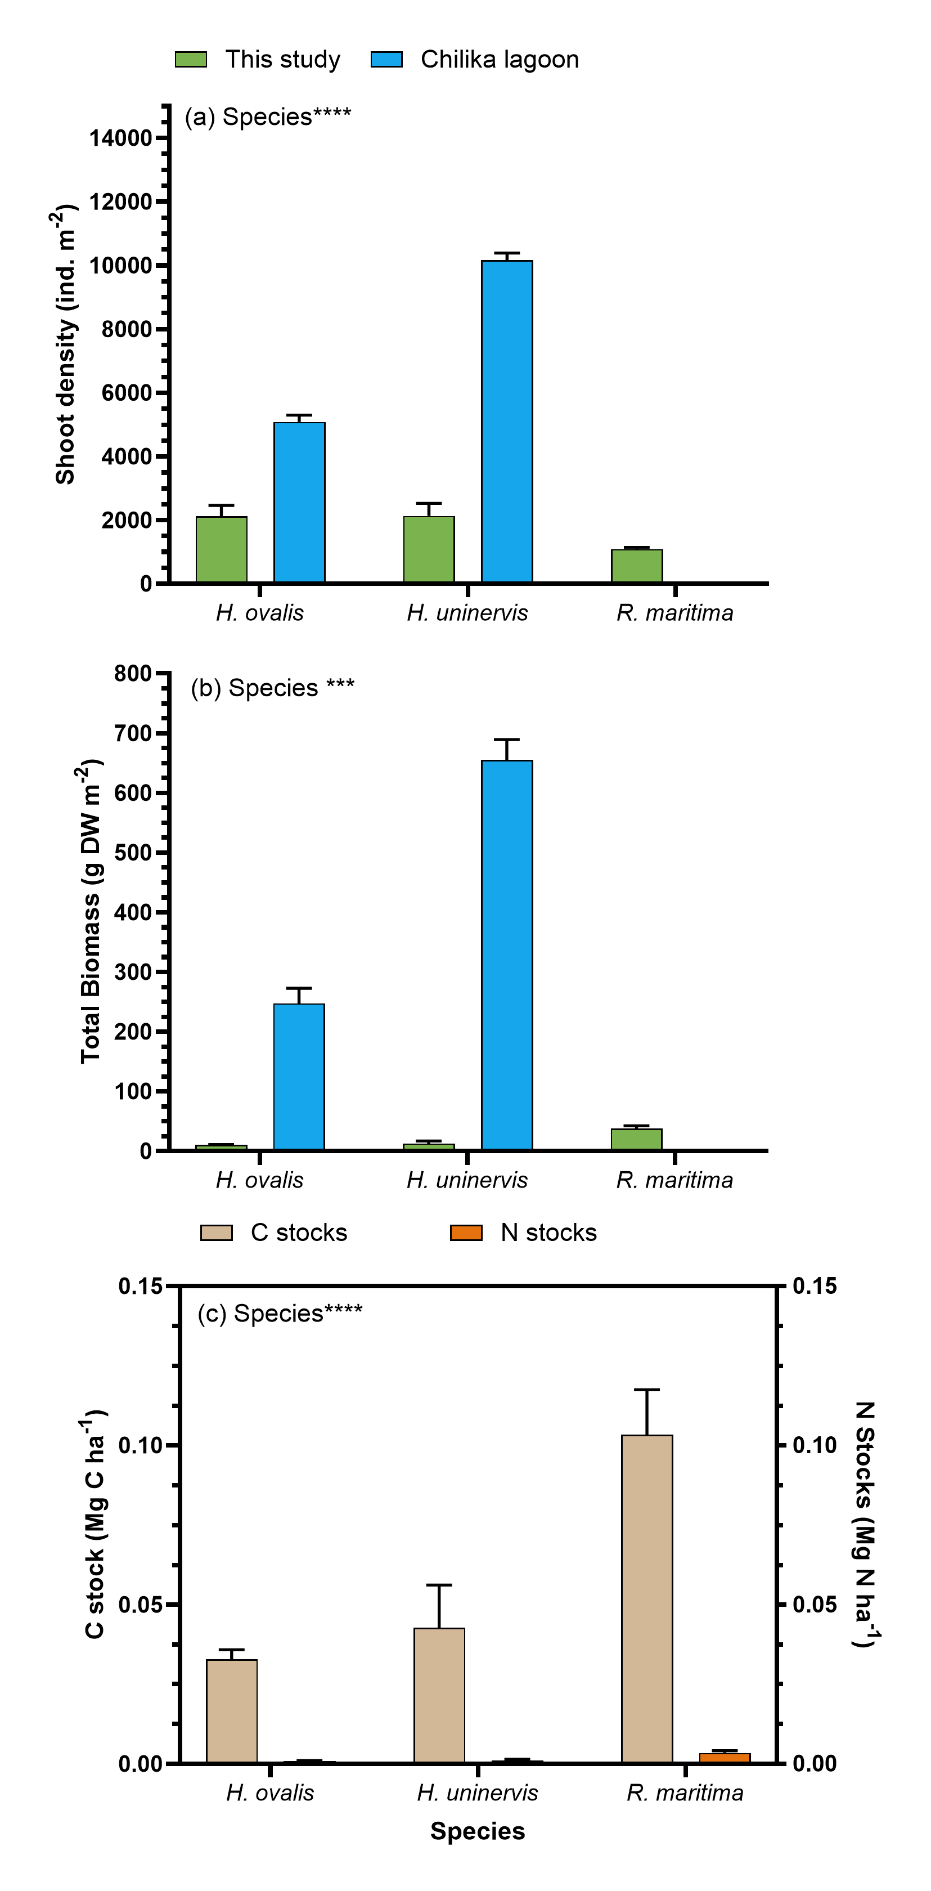 |
| --- |
